# Supplementary material for: Effects and Risk Assessment of the Polycyclic Musk Compounds Galaxolide® and Tonalide® on Early Life Stages of Marine Organisms
Source: Preprints.org preprint supplement (doi:10.20944/preprints202102.0140.v1), 2021-02-04
Supplement: Supplementary file 3 [file supplementary]

**Supplementary Materials**

**Table S1.** Spearman rank order of correlation (r) values recorded for the effect of galaxolide (HHCB) and tonalide (AHTN) on microalagae exposed for 72 h (n = 3). Asterisk(s) * & ** represent significant levels at p < 0.05 and 0.01, respectively.

|  | **HHCB** | **AHTN** |
| --- | --- | --- |
| *Phaeodactylum tricornotum* | -0.131 | -0.360 |
| *Tretraselmis chuii* | 0.284 | -0.667** |
| *Isochrysis galbana* | 0.120 | 0.098 |
| *Raphidocelis subcapitata* | -0.349 | -0.589* |

**Table S2.** Spearman rank order of correlation (r) values recorded for the effect of galaxolide (HHCB) and tonalide (AHTN) on marine organisms exposed for 72 h (n = 3). Asterisk(s) * & ** represent significant levels at p < 0.05 and 0.01, respectively; (-) represent values not determined.

|  | **HHCB** | **AHTN** |
| --- | --- | --- |
| *Artemia franciscana* mortality | 0.305 | -0.118 |
| *Artemia franciscana* mobility | -0.020 | 0.300 |
| *Paracentrotus lividus* fertilization | -0.747** | -0.450 |
| *Paracentrotus lividus* larvae development | 0.787** | 0.415 |
| *Mytilus galloprovincialis* larvae development | 0.820** | 0.371 |
| *Sparus aurata* mortality test | 0.659** | 0.708** |
